# Supplementary material for: Autologous CMV-specific T cells are a safe adjuvant immunotherapy for primary glioblastoma multiforme
Source: JCI journal article supplement (doi:10.1172/jci138649), 2020-08-05
Supplement: sd2 [file 2]

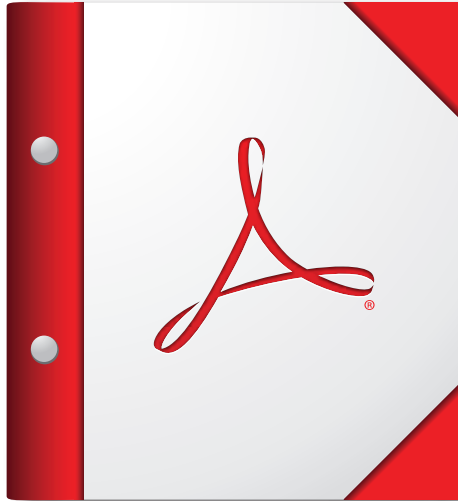

**For the best experience, open this PDF portfolio in  
Acrobat X or Adobe Reader X, or later.**

**Get Adobe Reader Now!**
